# Supplementary material for: NSUN6 and HTR7 disturbed the stability of carotid atherosclerotic plaques by regulating the immune responses of macrophages
Source: PubMed Central journal article supplement (PMC11500533; doi:10.1515/med-2024-1072), 2024-10-24
Supplement: med-2024-1072-sm.pdf [file med-2024-1072-sm.pdf]

# Supplementary material

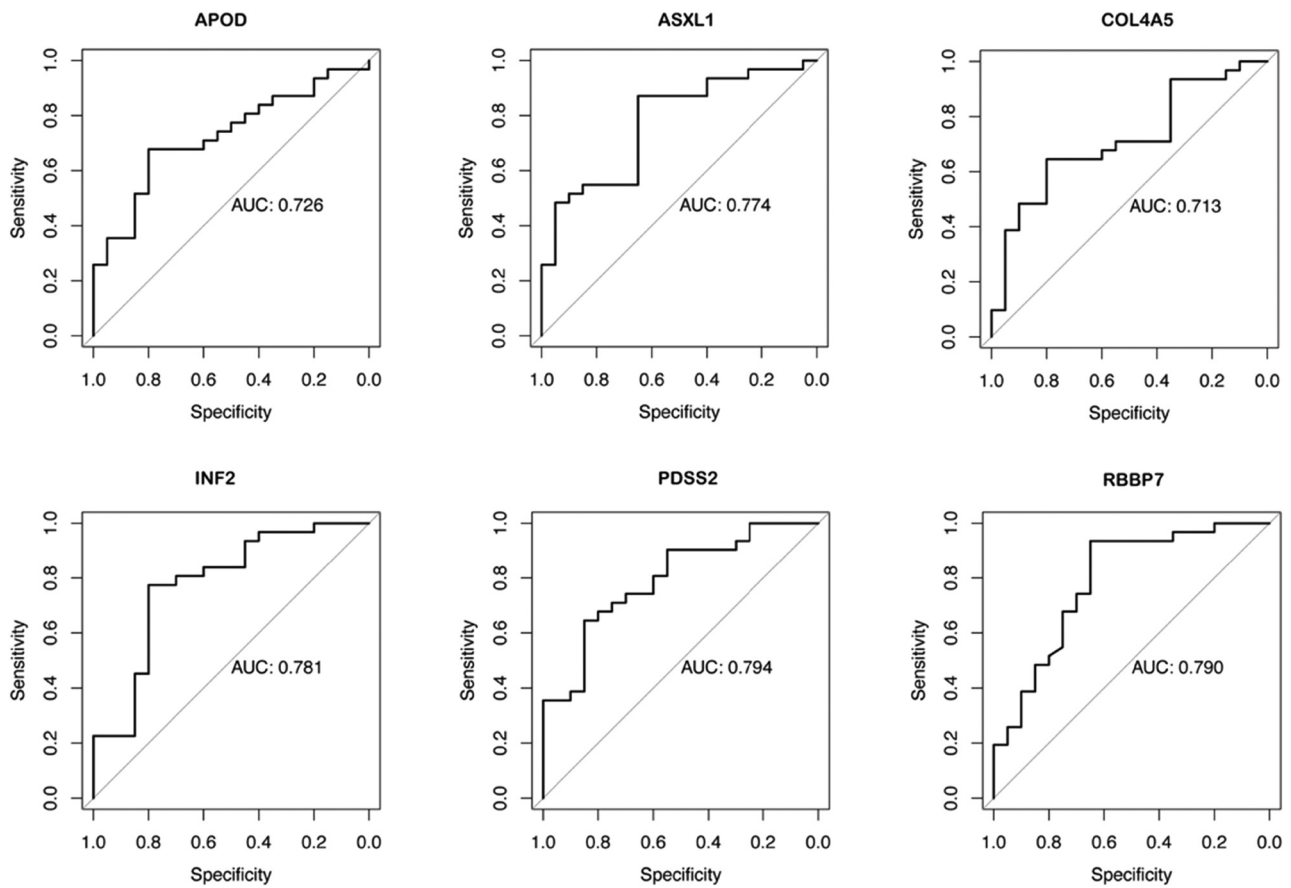

**Figure S1:** ROC of hub genes in distinguishing stable and unstable carotid atherosclerotic plaques.

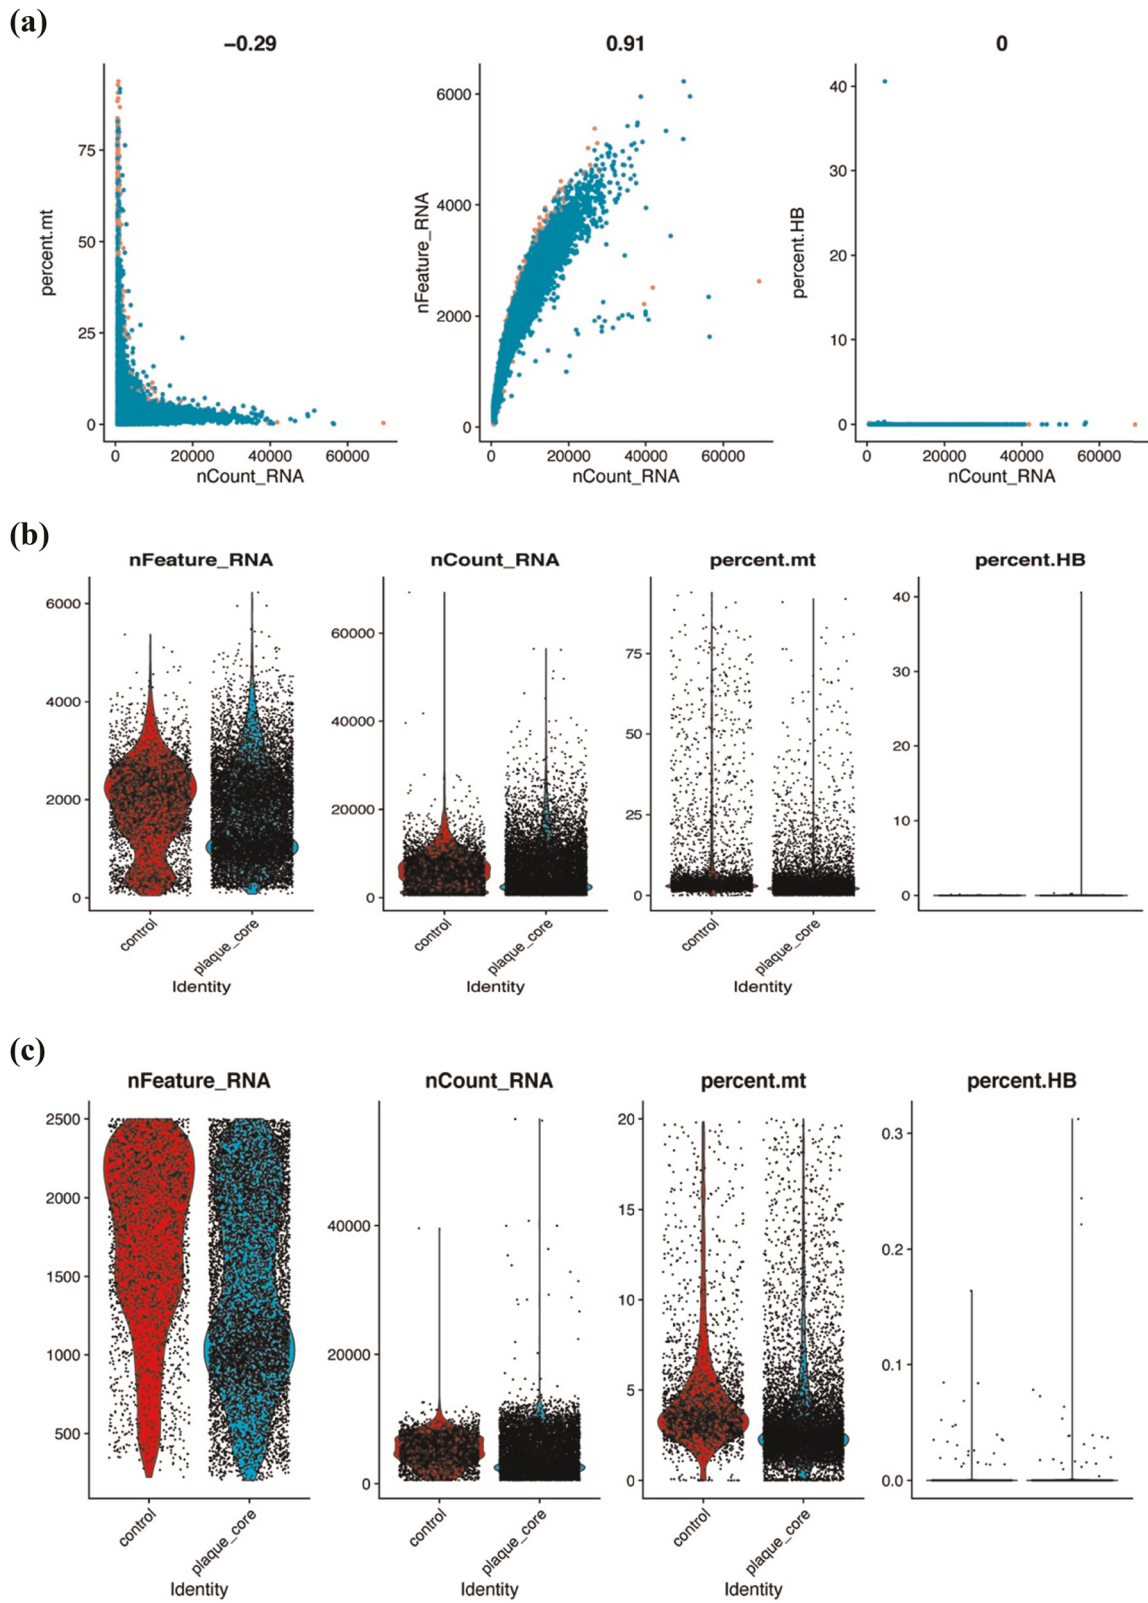

**Figure S2:** (a) and (b) Single-cell RNA-seq data before quality control. (c) Single-cell RNA-seq data after quality control.
